# Supplementary material for: The Genetic Architecture Underlying the Evolution of a Rare Piscivorous Life History Form in Brown Trout after Secondary Contact and Strong Introgression
Source: PubMed Central journal article supplement (PMC6026935; doi:10.3390/genes9060280), 2018-05-31
Supplement: genes-09-00280-s001.pdf [file genes-09-00280-s001.pdf]

**The genetic architecture underlying the evolution of a rare piscivorous life history form in brown trout after secondary contact and strong introgression.**

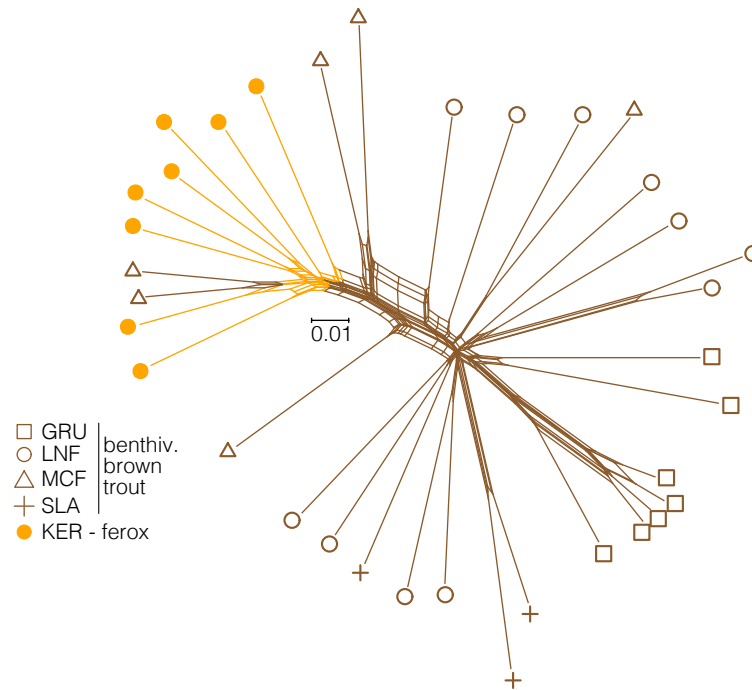

**Figure S1.** Neighbour-joining network based on 16,066 SNPs.

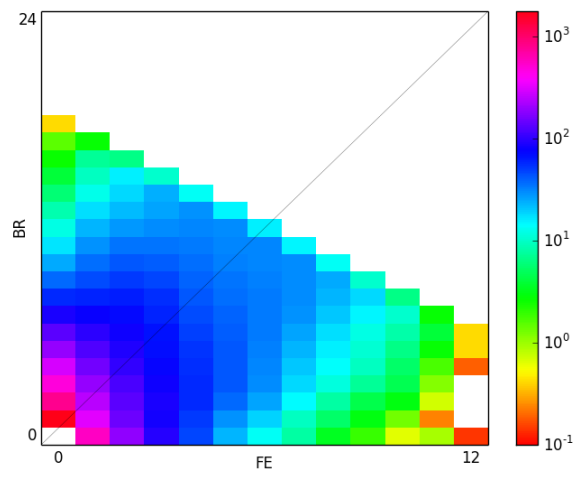

**Figure S2.** Folded site-frequency spectrum for ferox trout (FE) and combined benthivorous brown trout (BR).

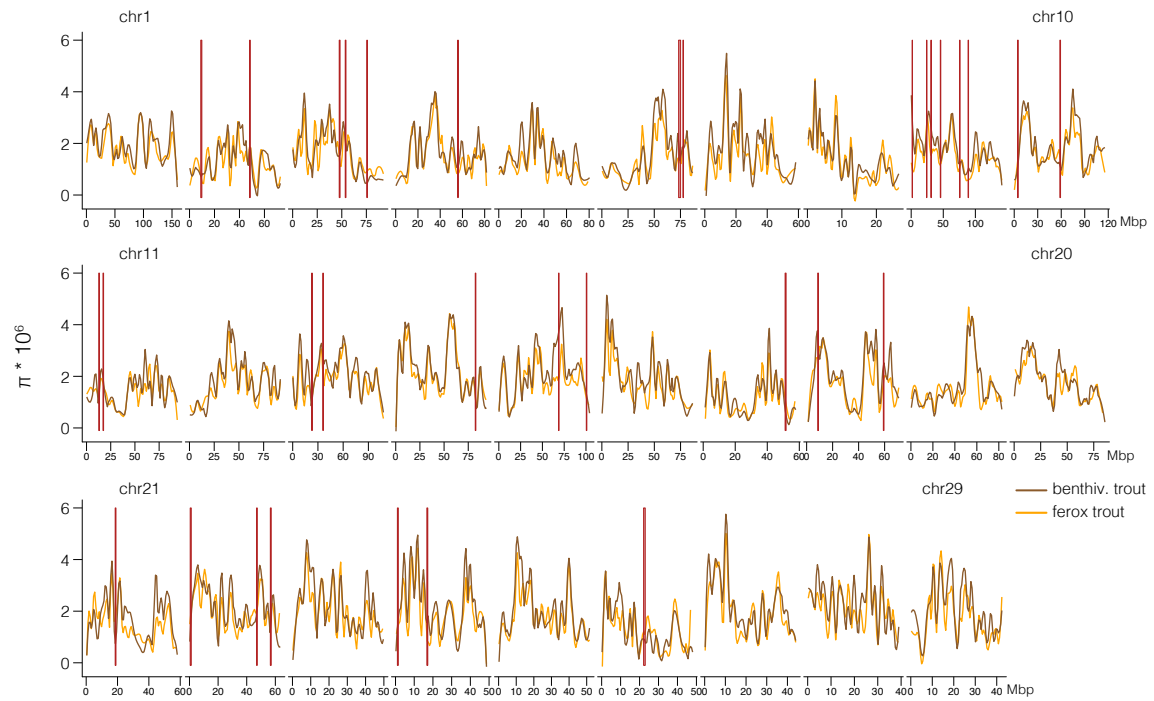

**Figure S3.** Genome scan of nucleotide diversity ( $\pi$ ) across each chromosome for benthivorous brown trout (brown line) and ferox trout (orange line). Genomic islands of divergence are marked with red bars.

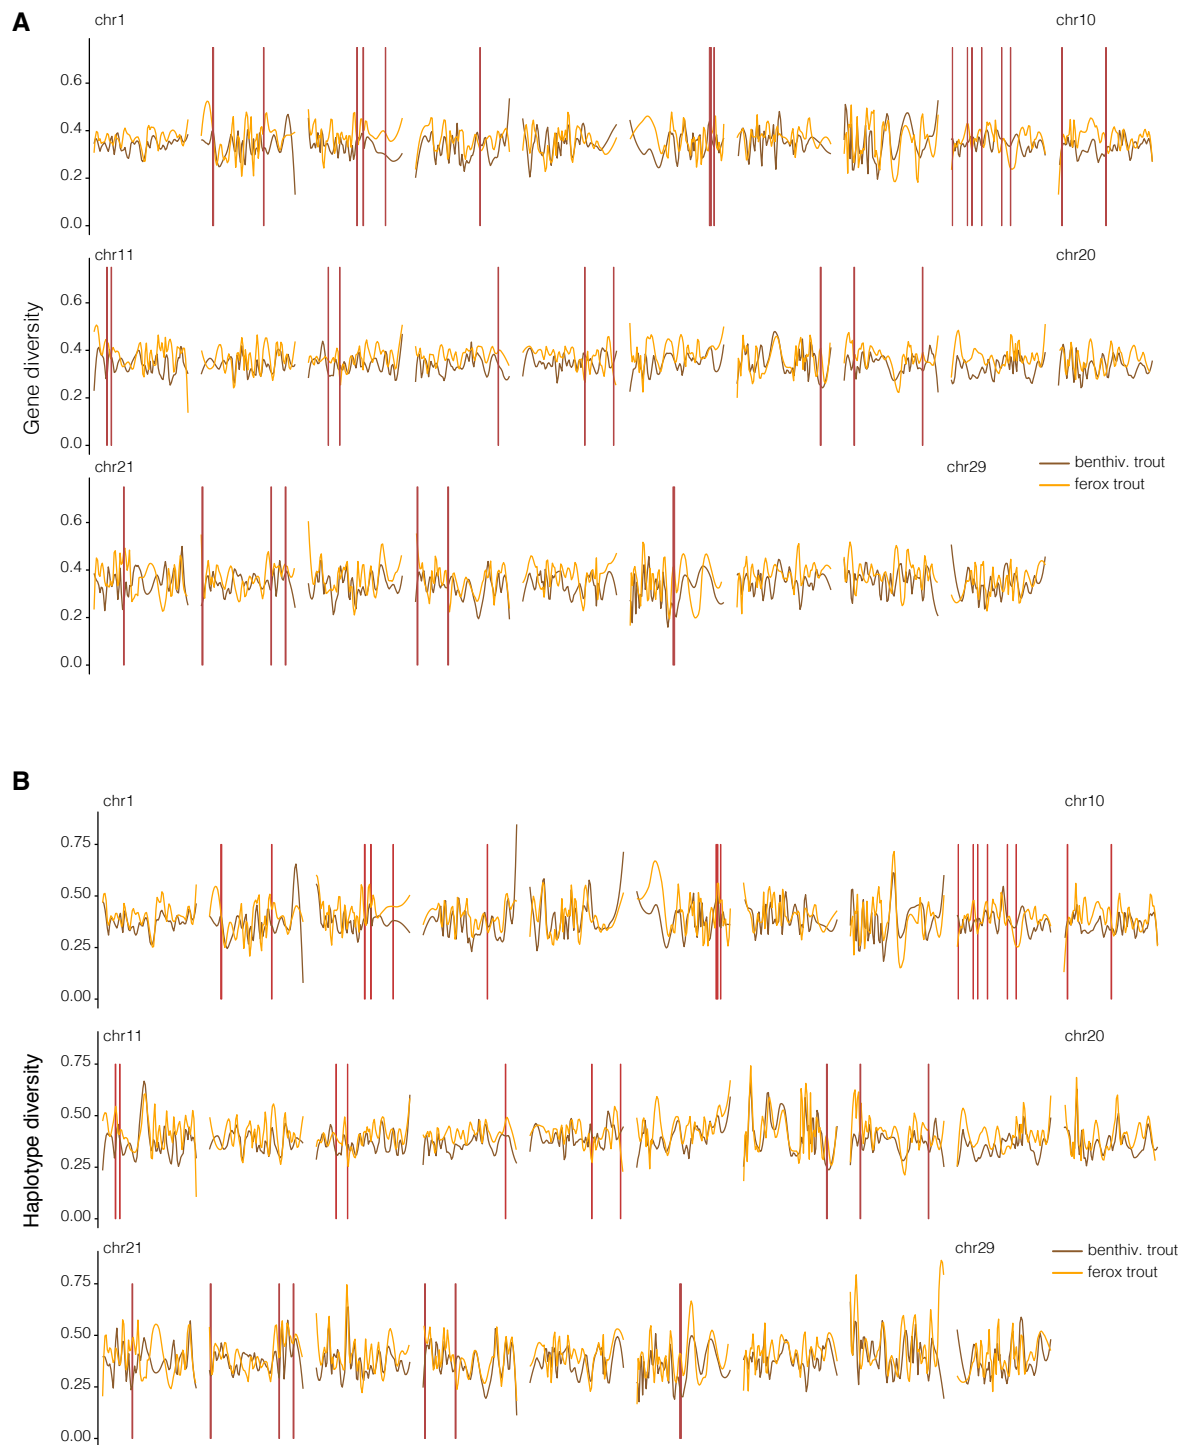

**Figure S4.** Genome scan of gene diversity and haplotype diversity, both calculated based on haplotype-information derived from full RAD loci. Genomic islands of divergence are marked with red bars.

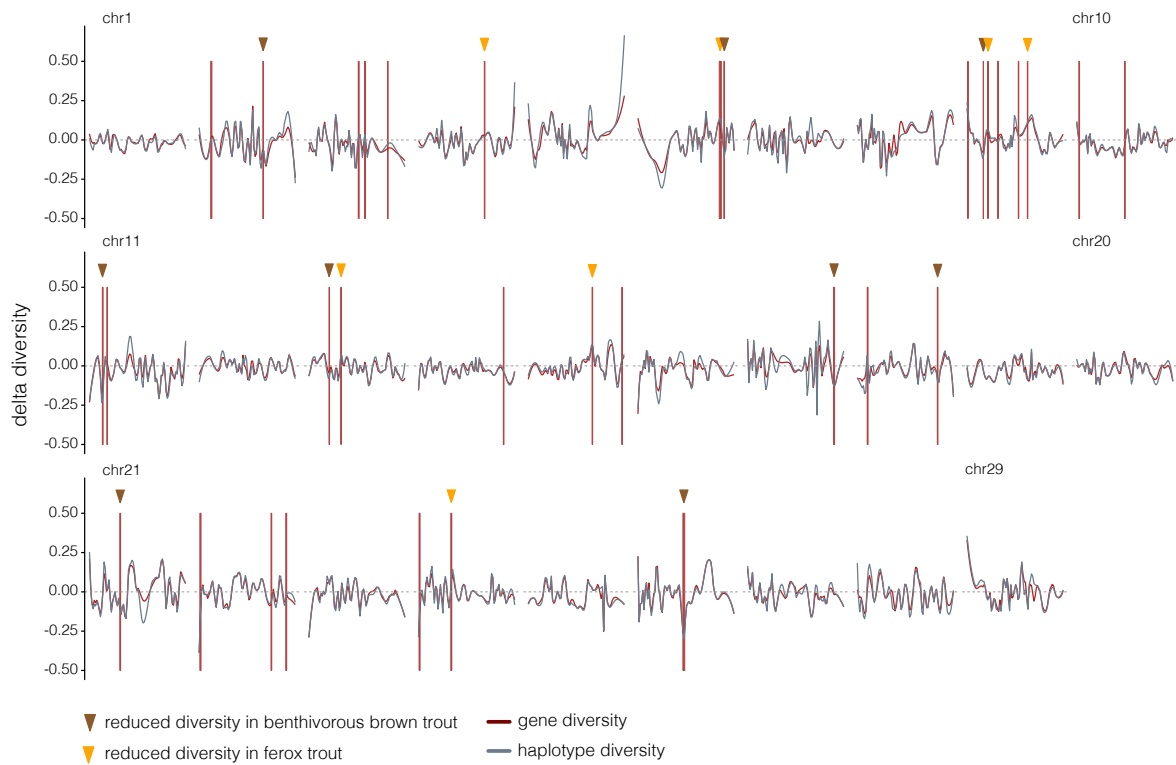

**Figure S5.** Delta haplotype and gene diversity across the Atlantic salmon genome. Negative delta diversity shows reduced diversity in benthivorous brown trout compared to ferox trout, whereas positive delta diversity shows reduced diversity in ferox trout. Genomic islands are highlighted with red bars. Brown and orange arrow heads highlight genomic islands with reduced diversity in benthivorous brown trout or ferox trout, respectively.

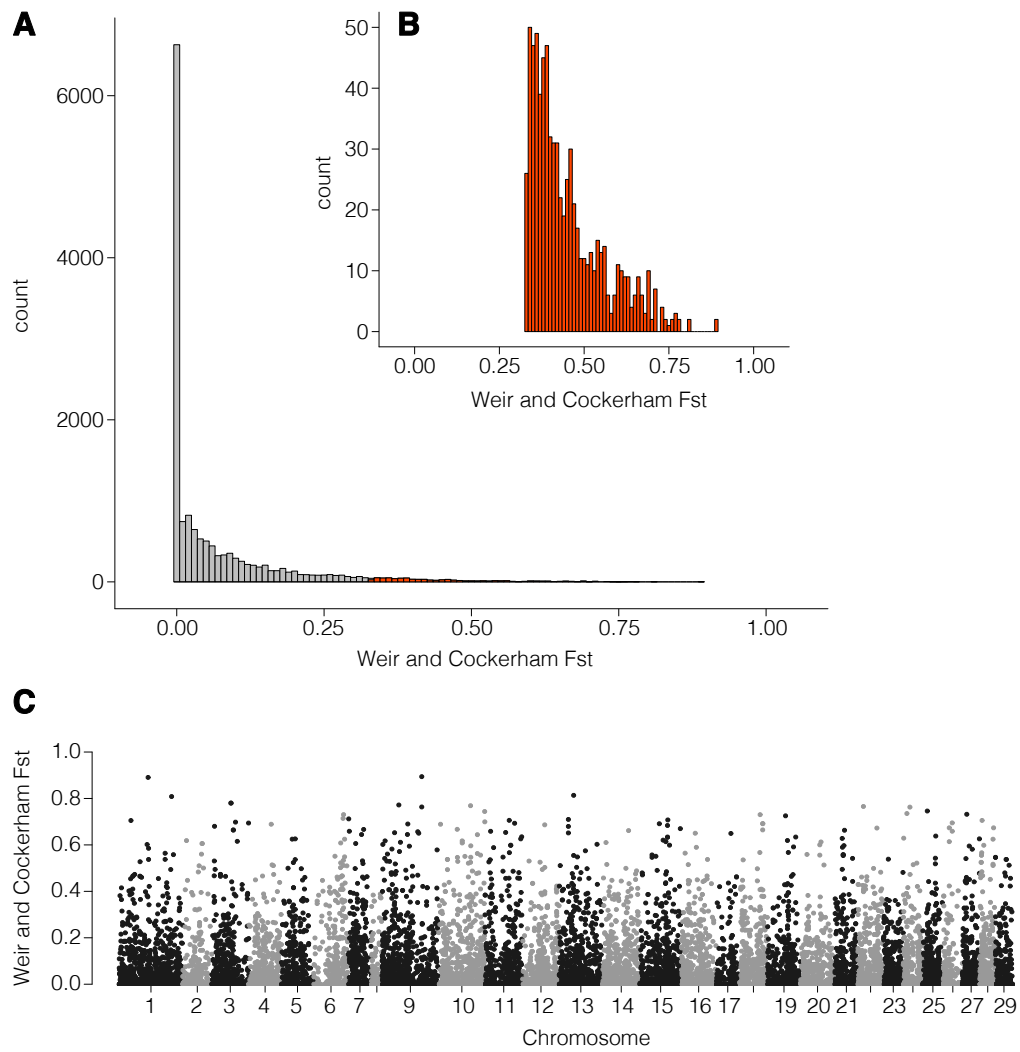

**Figure S6.** Fst distribution across the genome. **A)** Genome-wide distribution of Fst-values. Top 5% Fst-outlier loci are highlighted in red. **B)** Fst-value distribution of top 5% Fst-outlier loci. **C)** Distribution of Fst-values across the Atlantic salmon genome. Loci are alternatingly coloured by chromosome.

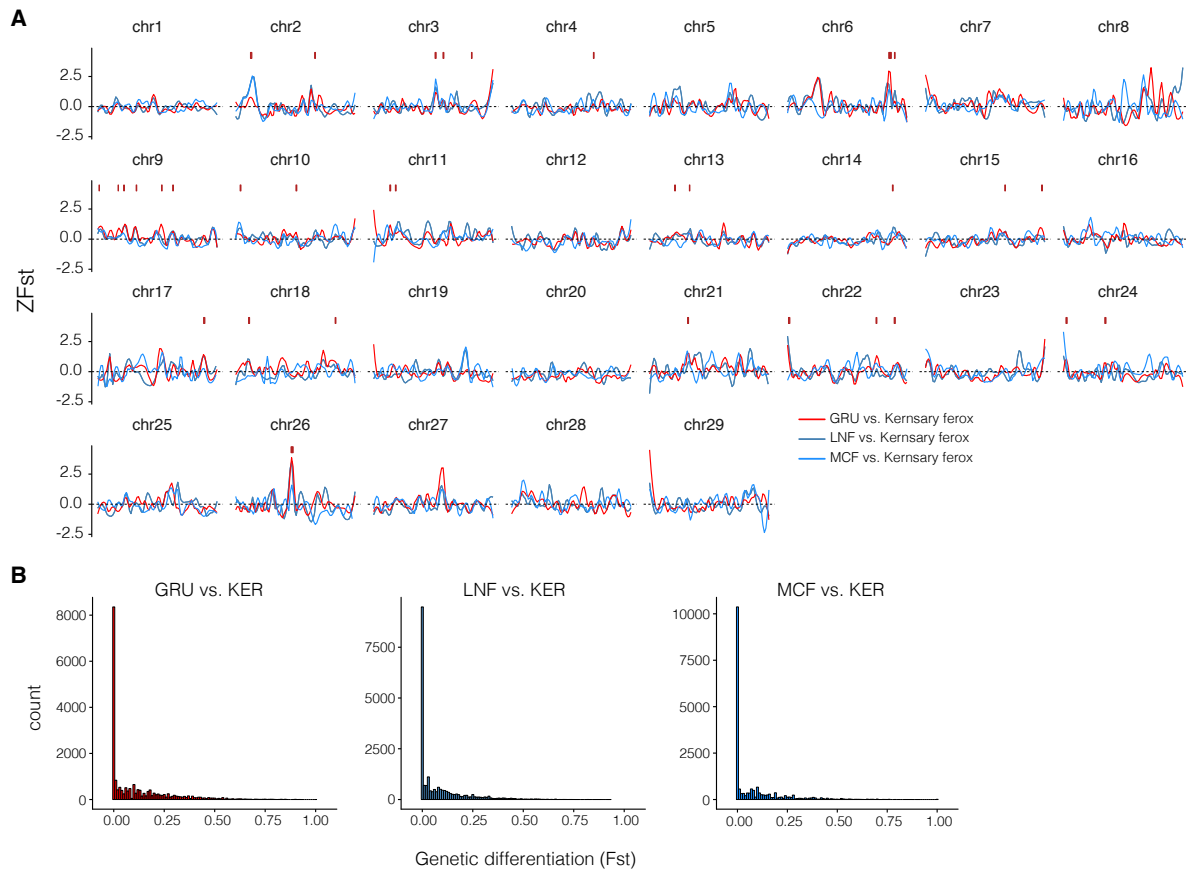

**Figure S7. A)** Genetic differentiation (loess-smoothed window-based ZFst) across the Atlantic salmon genome for sampling site specific comparisons. Red bars highlight genomic islands identified in the combined genome scan. **B)** Genome-wide distribution of Fst-values (on a SNP basis) by sampling site.

**Table S1.** Model selection of the most likely demographic model for the reduced dataset.

| <b>Model</b>    | <b>ln(lhood)<sup>1</sup></b> | <b>N.parameters</b> | <b>AIC</b> | <b>ΔAIC</b> |
|-----------------|------------------------------|---------------------|------------|-------------|
| <b>SCadm</b>    | -85481.55                    | 8                   | 170979.1   | 0.0         |
| <b>IMchange</b> | -85486.90                    | 7                   | 170987.8   | 8.7         |
| <b>SC</b>       | -85504.60                    | 6                   | 171021.2   | 42.1        |
| <b>IM</b>       | -85506.77                    | 5                   | 171023.5   | 44.4        |
| <b>AM</b>       | -85506.88                    | 6                   | 171025.8   | 46.7        |
| <b>SI</b>       | -85776.11                    | 4                   | 171560.2   | 581.1       |

Table legend: <sup>1</sup>ln(likelihood), AIC: Aike information criterion.



**Table S2. GO-terms (biological processes) associated with genes within genomic islands.** No GO-term was significantly overrepresented (FDR < 0.05).

| GO-term    | Description                                                   | Fold enriched | P-value | FDR | Gene names                                                                                                       |
|------------|---------------------------------------------------------------|---------------|---------|-----|------------------------------------------------------------------------------------------------------------------|
| GO:0055085 | transmembrane transport                                       | 2.85          | 0.0013  | 1   | atp6v1d;mmgt1;slc25a40;slc37a1;slc7a2;slc39a9;chrna5;cyc1;gabrp;chrnb4;grik5                                     |
| GO:0006401 | RNA catabolic process                                         | 10.44         | 0.0029  | 1   | rnaseh1;smg8;cnot7                                                                                               |
| GO:0034220 | ion transmembrane transport                                   | 3.09          | 0.0039  | 1   | mmgt1;slc7a2;slc39a9;chrna5;cyc1;gabrp;chrnb4;grik5                                                              |
| GO:0006810 | transport                                                     | 1.91          | 0.0048  | 1   | atp6v1d;ergic3;mmgt1;chmp3;slc25a40;slc37a1;slc7a2;slc39a9;ccs;chrna5;ap5s1;cyc1;syt12;gabrp;pom121;chrnb4;grik5 |
| GO:0051234 | establishment of localization                                 | 1.87          | 0.0060  | 1   | atp6v1d;ergic3;mmgt1;chmp3;slc25a40;slc37a1;slc7a2;slc39a9;ccs;chrna5;ap5s1;cyc1;syt12;gabrp;pom121;chrnb4;grik5 |
| GO:0006811 | ion transport                                                 | 2.61          | 0.0068  | 1   | mmgt1;slc7a2;slc39a9;ccs;chrna5;cyc1;gabrp;chrnb4;grik5                                                          |
| GO:0007179 | transforming growth factor beta receptor signaling pathway    | 13.41         | 0.0096  | 1   | smad5;smad9                                                                                                      |
| GO:0071559 | response to transforming growth factor beta                   | 13.41         | 0.0096  | 1   | smad5;smad9                                                                                                      |
| GO:0071560 | cellular response to transforming growth factor beta stimulus | 13.41         | 0.0096  | 1   | smad5;smad9                                                                                                      |
| GO:0010629 | negative regulation of gene expression                        | 3.82          | 0.0097  | 1   | eif4ebp2;smad9;cnot7;brms1la;nrde2                                                                               |

**Table S3. KEGG pathways (*Danio rerio*) associated with genes within genomic islands.** No KEGG pathway was significantly overrepresented (FDR < 0.05).

| KEGG pathway | Description                                            | Fold enriched | P-value | FDR | Gene names                      |
|--------------|--------------------------------------------------------|---------------|---------|-----|---------------------------------|
| dre04110     | Cell cycle                                             | 3.406         | 0.0569  | 1   | e2f1;ccne1;dbf4                 |
| dre04068     | FoxO signaling pathway                                 | 2.749         | 0.0944  | 1   | cat;pik3r5;agap2                |
| dre04146     | Peroxisome                                             | 3.561         | 0.1079  | 1   | cat;crot                        |
| dre04080     | Neuroactive ligand-receptor interaction                | 1.929         | 0.1132  | 1   | lpar1;chrna5;gabrp;chrnb4;grik5 |
| dre00563     | Glycosylphosphatidylinositol (GPI)-anchor biosynthesis | 6.812         | 0.1372  | 1   | pigu                            |
| dre04350     | TGF-beta signaling pathway                             | 3.072         | 0.1375  | 1   | smad5;smad9                     |
| dre00515     | Mannose type O-glycan biosynthesis                     | 6.528         | 0.1427  | 1   | b4gat1                          |
| dre04012     | ErbB signaling pathway                                 | 2.798         | 0.1596  | 1   | pik3r5;camk2b                   |
| dre00514     | Other types of O-glycan biosynthesis                   | 5.402         | 0.1699  | 1   | colgalt1                        |
| dre04144     | Endocytosis                                            | 1.832         | 0.1716  | 1   | agap1;chmp3;cav2;agap2          |

**Table S4. Genes associated with loci putatively under selection.**

| Chromosome  | Start    | End      | Annotation ASI00 | SNP position | Gene name                                                          |
|-------------|----------|----------|------------------|--------------|--------------------------------------------------------------------|
| NC_027300.1 | 72268063 | 73360509 | macroD2          | 72742754     | MACRO Domain Containing 2                                          |
| NC_027301.1 | 48437588 | 48465607 | LOC106587077     | 48444034     | phosphoinositide 3-kinase regulatory subunit 5-like                |
| NC_027306.1 | 1182340  | 1211964  | LOC106608430     | 1191948      | toll-like receptor 2                                               |
| NC_027308.1 | 41684365 | 41709169 | LOC106611358     | 41703379     | potassium channel subfamily K member 2-like                        |
| NC_027312.1 | 35989028 | 36000630 | LOC106567076     | 35989910     | phosphatidylinositol 5-phosphate 4-kinase type-2 gamma             |
| NC_027314.1 | 69288197 | 69426575 | LOC100380856     | 69438241     | thymocyte selection-associated high mobility group box protein TOX |
| NC_027316.1 | 31048572 | 31051812 | LOC106575965     | 31040284     | submaxillary mucin-like protein                                    |
| NC_027320.1 | 18801789 | 18803016 | Transmembrane    | 18800138     | Transmembrane protein 50B                                          |
| NC_027320.1 | 18894788 | 18901571 | LOC106581898     | 18865196     | ribosomal RNA processing protein 1 homolog B-like                  |
| NC_027320.1 | 21137945 | 21315616 | LOC106581930     | 21291538     | PTB domain-containing engulfment adapter protein 1                 |
| NC_027321.1 | 13654002 | 13783467 | LOC106582849     | 13766129     | E3 ubiquitin-protein ligase PDZRN3-like                            |
| NC_027324.1 | 32744589 | 32876560 | LOC106586624     | 32836501     | immunoglobulin superfamily member 3-like                           |
